# Supplementary material for: Dye-Sensitized Solar Cells (DSSCs) Based on Extracted Natural Dyes
Source: Hindawi journal article supplement (doi:10.1155/2019/1867271), 2019-04-18
Supplement: f1 [file 1867271.f1.pdf]

## Supporting Information

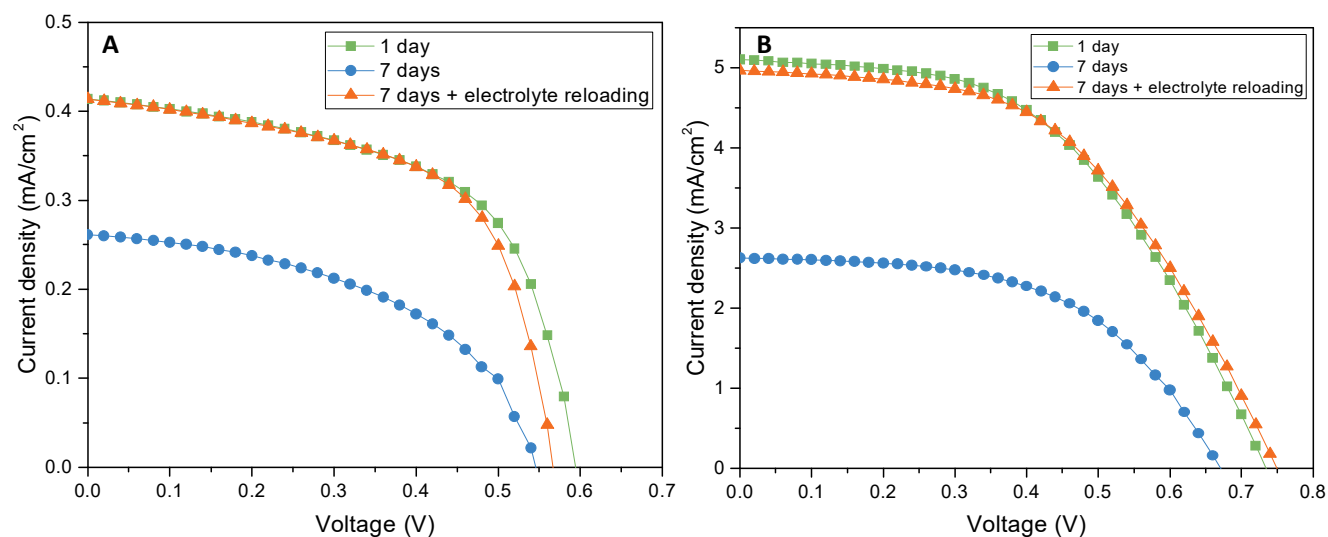

SI 1: J-V curves of (A) spinach-based DSSC and (B) N719-based DSSC after extended operation time and electrolyte reloading.

SI 2: Performance of spinach-based DSSC after extended operation time and electrolyte reloading

| Days                                    | $J_{sc}$ ( $\text{mA} \cdot \text{cm}^{-2}$ ) | $J_m$ ( $\text{mA} \cdot \text{cm}^{-2}$ ) | $V_{oc}$ (V) | $V_m$ (V) | FF (%)   | $\eta$ (%) |
|-----------------------------------------|-----------------------------------------------|--------------------------------------------|--------------|-----------|----------|------------|
| 1                                       | 0.41                                          | 0.309                                      | 0.59         | 0.46      | 58.75982 | 0.171253   |
| 7                                       | 0.26                                          | 0.181                                      | 0.55         | 0.38      | 48.0979  | 0.082867   |
| 7 / followed with electrolyte reloading | 0.4135                                        | 0.32                                       | 0.57         | 0.442     | 60.00976 | 0.17041    |

SI 3: Performance of N719-based DSSC after extended operation time and electrolyte reloading

| Days                                    | $J_{sc}$ ( $\text{mA} \cdot \text{cm}^{-2}$ ) | $J_m$ ( $\text{mA} \cdot \text{cm}^{-2}$ ) | $V_{oc}$ (V) | $V_m$ (V) | FF (%)   | $\eta$ (%) |
|-----------------------------------------|-----------------------------------------------|--------------------------------------------|--------------|-----------|----------|------------|
| 1                                       | 5.1                                           | 4.04                                       | 0.74         | 0.46      | 49.24218 | 2.239036   |
| 7                                       | 2.63                                          | 2.07                                       | 0.67         | 0.46      | 54.0378  | 1.147229   |
| 7 / followed with electrolyte reloading | 4.97                                          | 4.01                                       | 0.74         | 0.46      | 50.15498 | 2.22241    |
